# Supplementary material for: Polymorphisms in VDR, CYP27B1, CYP2R1, GC and CYP24A1 Genes as Biomarkers of Survival in Non-Small Cell Lung Cancer: A Systematic Review
Source: Nutrients. 2023 Mar 21;15(6):1525. doi: 10.3390/nu15061525 (PMC10057500; doi:10.3390/nu15061525)
Supplement: Supplementary file 1 [file nutrients-15-01525-s001.zip › Table S2.pdf]

**Table S2.** Reporting quality of the included pharmacogenetic studies

| Study                | Item 1   | Item 2   | Item 3  | Item 4  | Item 5  | Item 6   | Item 7   | Item 8   | Item 9  | Score (%)  |
|----------------------|----------|----------|---------|---------|---------|----------|----------|----------|---------|------------|
| Zhou et al. (2006)   | I        | N        | N       | I       | Y       | Y        | Y        | Y        | Y       | 6 (66.6)   |
| Heist et al. (2008)  | Y        | N        | N       | I       | Y       | N        | Y        | N        | Y       | 4.5 (50)   |
| Liu et al. (2011)    | I        | I        | N       | I       | Y       | N        | Y        | Y        | Y       | 5.5 (61.1) |
| Xiong et al. (2013)  | I        | N        | N       | I       | Y       | N        | N        | N        | Y       | 3 (33.3)   |
| Kong et al. (2020)   | I        | N        | N       | I       | Y       | Y        | N        | N        | Y       | 4 (44.4)   |
| Pineda et al. (2021) | Y        | N        | N       | I       | Y       | Y        | Y        | Y        | Y       | 6.5 (72.2) |
| Item                 |          |          |         |         |         |          |          |          |         |            |
| Y %                  | 2 (33.3) | 0 (0.0)  | 0 (0.0) | 0 (0.0) | 6 (100) | 3 (50.0) | 4 (66.6) | 3 (50.0) | 6 (100) |            |
| I %                  | 4 (66.6) | 1 (16.6) | 0 (0.0) | 6 (100) | 0 (0.0) | 0 (0.0)  | 0 (0.0)  | 0 (0.0)  | 0 (0.0) |            |
| N %                  | 0 (0.00) | 5 (83.3) | 6 (100) | 0 (0.0) | 0 (0.0) | 3 (50.0) | 2 (33.3) | 3 (50.0) | 0 (0.0) |            |

I, incomplete. N, no. Y, yes.

Item description: Item 1: Describe laboratory methods, including source and storage of DNA, genotyping methods and platforms; Item 2: Describe error rate and call rate; Item 3: State the laboratory/center at which genotyping was performed; Item 4: Provide a hint on whether the genotypes were assigned in one single batch or a few smaller batches; Item 5: Report number of individuals in whom genotyping was attempted to and how many of these samples were successfully genotyped; Item 6: Describe methods used to assess/address population stratification; Item 7: Describe any methods used for inferring genotypes or haplotypes; Item 8: Stated whether Hardy–Weinberg equilibrium was considered; Item 9: State if the study is the first report to report such genetic association, a replication or both.
